# Supplementary material for: Fall Detection in Individuals With Lower Limb Amputations Using Mobile Phones: Machine Learning Enhances Robustness for Real-World Applications
Source: PubMed Central journal article supplement (PMC5656773; doi:10.2196/mhealth.8201), 2017-10-11
Supplement: mhealth_v5i10e151_app1.pdf [file mhealth_v5i10e151_app1.pdf]

Supplementary table: Activity protocol. The set of activities performed by the subjects to mimic daily functional activities.

| <b>Activity</b> | <b>Phone Location</b> | <b>Duration</b> |
|-----------------|-----------------------|-----------------|
| Sitting         | Hand                  | 60s             |
| Standing        | Hand                  | 30s             |
| Walking         | Hand                  | 60s             |
| Walking         | Pocket                | 60s             |
| Standing        | Pocket                | 30s             |
| Sitting         | Pocket                | 60s             |
| Sitting         | Hand                  | 60s             |
| Standing        | Hand                  | 30s             |
| Walking         | Hand                  | 60s             |
| Walking         | Waist                 | 60s             |
| Standing        | Waist                 | 30s             |
| Sitting         | Waist                 | 60s             |
| Stairs Descent  | Waist/Pocket*         | 30s             |
| Stairs Ascent   | Waist/Pocket*         | 30s             |
| Lying           | Waist                 | 60s             |
| Lying           | Hand                  | 60s             |
| Lying           | Pocket                | 60s             |

\* Location for stairs descent/ascent was assigned randomly as waist or pocket
